# Supplementary material
Source: HighWire-hosted journal article supplement (https://bjgp.org/highwire/filestream/44697/field_highwire_adjunct_files/0/BJGP.2021.0711_suppl.pdf)
Supplement: BJGP.2021.0711_suppl.pdf [file BJGP.2021.0711_suppl.pdf]

**Table S1: Questionnaire used**

| <b>Demographic Section 1</b>                 |                                                                                                                                                                                                                                                                                                    |
|----------------------------------------------|----------------------------------------------------------------------------------------------------------------------------------------------------------------------------------------------------------------------------------------------------------------------------------------------------|
| 1. Do you have a diagnosis of the following? | Tick Boxes: <ul style="list-style-type: none"> <li>• Vitamin B12 Deficiency</li> <li>• Pernicious Anaemia</li> <li>• Neither of the above (told ineligible for study)</li> </ul>                                                                                                                   |
| 2. What is your age?                         | Tick boxes: <ul style="list-style-type: none"> <li>• 18-24 years old.</li> <li>• 25-34 years old.</li> <li>• 35-44 years old.</li> <li>• 45-54 years old.</li> <li>• 55-64 years old.</li> <li>• 65-74 years old.</li> <li>• 75 years and older</li> </ul>                                         |
| 3. What is your gender?                      | Tick boxes: <ul style="list-style-type: none"> <li>• Male</li> <li>• Female</li> <li>• Other (please state)</li> </ul>                                                                                                                                                                             |
| 4. What is your education level?             | Tick boxes: <ul style="list-style-type: none"> <li>• Primary school</li> <li>• Secondary school up to 16 years</li> <li>• Higher or secondary or further education (A-levels, BTEC, etc.)</li> <li>• College or university</li> <li>• Post-graduate degree</li> <li>• Prefer not to say</li> </ul> |
| 5. What is your employment status?           | Tick boxes: <ul style="list-style-type: none"> <li>• Employee or self-employed</li> <li>• Student</li> <li>• Full time caring responsibilities at home</li> <li>• Unemployed</li> <li>• Other (please state)</li> </ul>                                                                            |
| 6. Which region do you live in?              | Tick boxes: <ul style="list-style-type: none"> <li>• East of England</li> <li>• East Midlands</li> <li>• London</li> <li>• North East</li> <li>• North West</li> <li>• Northern Ireland</li> </ul>                                                                                                 |

|                                                                                                                                                                   |                                                                                                                                                                                      |
|-------------------------------------------------------------------------------------------------------------------------------------------------------------------|--------------------------------------------------------------------------------------------------------------------------------------------------------------------------------------|
|                                                                                                                                                                   | <ul style="list-style-type: none"> <li>• Scotland</li> <li>• South East</li> <li>• South West</li> <li>• Wales</li> <li>• West Midlands</li> <li>• Yorkshire / Humberside</li> </ul> |
| 7. 'How often do you need to have someone help you when you read instructions, pamphlets, or other written material from your doctor or pharmacy? (SILS one item) | Likert Scale<br>1. Never<br>2. Rarely<br>3. Sometimes<br>4. Often<br>5. Always                                                                                                       |
| 6. How would you rate your overall health?                                                                                                                        | Tick box:<br><ul style="list-style-type: none"> <li>• poor</li> <li>• fair</li> <li>• good</li> <li>• excellent</li> </ul>                                                           |
| Section 2: Patient Safety in Primary Care                                                                                                                         |                                                                                                                                                                                      |
| 1. What treatment do you currently receive from your GP for your B12 deficiency/pernicious anaemia                                                                | Free Text                                                                                                                                                                            |
| 2. How often do you receive this treatment?                                                                                                                       | Free Text                                                                                                                                                                            |
| 3. How has Covid-19 impacted the treatment of your B12 Deficiency or Pernicious Anaemia in primary care?                                                          | Free Text                                                                                                                                                                            |
| Insert Validated PCPMOS 28-item measure. Responses on 5 point Likert Scale, Strongly Agree to Strongly Disagree                                                   |                                                                                                                                                                                      |
| I was always treated with dignity and respect.                                                                                                                    |                                                                                                                                                                                      |
| The doctor always considered what I want for my care.                                                                                                             |                                                                                                                                                                                      |
| The doctor did not have the skills, experience or knowledge to correctly manage my health condition.                                                              |                                                                                                                                                                                      |
| The doctor always seemed to have the right information after I received treatment elsewhere.                                                                      |                                                                                                                                                                                      |
| The doctor was interrupted during my consultation.                                                                                                                |                                                                                                                                                                                      |
| Other health professionals at this practice did not have the skills, experience or knowledge to correctly manage my health condition.                             |                                                                                                                                                                                      |
| I got answers to all the questions I had regarding my care.                                                                                                       |                                                                                                                                                                                      |
| I was able to make an appointment with a health professional of my choice.                                                                                        |                                                                                                                                                                                      |
| I understood what staff were explaining to me about my care                                                                                                       |                                                                                                                                                                                      |
| Information about me that my health care team needed was always available e.g. discharge summary, referral letters, test results.                                 |                                                                                                                                                                                      |
| Staff always knew everything they needed to know to care for me. e.g. allergies, other conditions, medical history, medications.                                  |                                                                                                                                                                                      |

|                                                                                                                                           |                                                                                                                                                                                                                                                                     |
|-------------------------------------------------------------------------------------------------------------------------------------------|---------------------------------------------------------------------------------------------------------------------------------------------------------------------------------------------------------------------------------------------------------------------|
| The cost of medications prevented me from filling a script when I needed medication.                                                      |                                                                                                                                                                                                                                                                     |
| I was able to access the after hours service when needed.                                                                                 |                                                                                                                                                                                                                                                                     |
| I had enough time during the consultation with a health care professional.                                                                |                                                                                                                                                                                                                                                                     |
| I knew who to go to in the practice if I needed to ask a question.                                                                        |                                                                                                                                                                                                                                                                     |
| If I was referred important information about my care was passed on / made available.                                                     |                                                                                                                                                                                                                                                                     |
| Equipment needed for my care was always working properly.                                                                                 |                                                                                                                                                                                                                                                                     |
| I was involved in all the decisions about my care.                                                                                        |                                                                                                                                                                                                                                                                     |
| The practice was very clean.                                                                                                              |                                                                                                                                                                                                                                                                     |
| The cost of seeing a doctor, nurse or other health professional at the practice prevented me from seeking care when I needed it.          |                                                                                                                                                                                                                                                                     |
| I was able to make an appointment at a time that suited me.                                                                               |                                                                                                                                                                                                                                                                     |
| My test results were always available when required e.g. scans, blood tests, x-rays.                                                      |                                                                                                                                                                                                                                                                     |
| I always felt that staff listened to me about my concerns.                                                                                |                                                                                                                                                                                                                                                                     |
| Where necessary my doctor, nurse or other health professional regularly monitors/reviews my health condition.                             |                                                                                                                                                                                                                                                                     |
| Seeing the same doctor, nurse or other health professional is important to me.                                                            |                                                                                                                                                                                                                                                                     |
| Administration staff interacted with me in a manner I found acceptable.                                                                   |                                                                                                                                                                                                                                                                     |
| My referrals have always been appropriate.                                                                                                |                                                                                                                                                                                                                                                                     |
| I was always given enough information that I could understand about my care and treatment.                                                |                                                                                                                                                                                                                                                                     |
| Section 3: Self Medication                                                                                                                |                                                                                                                                                                                                                                                                     |
| 1. In general apart from treatments prescribed by your doctor do you sometimes take medications on your own to treat your B12 deficiency? | Yes/No<br>(No, end of survey)                                                                                                                                                                                                                                       |
| 2. If yes, which of the following do you take?                                                                                            | 1. Self-injection (in addition to anything prescribed by GP)<br>2. Oral medication in tablet form (in addition to anything prescribed by GP)<br>3. Oral medication in liquid form (in addition to anything prescribed by the GP)<br>Other (please state)            |
| 3. For what reasons do you self-medicate? (please tick all that apply)                                                                    | Tick box:<br>1. Unsatisfied with prescribed treatment effect<br>2. Unsatisfied with prescribed treatment frequency<br>3. Suboptimal relationships with healthcare professionals<br>4. Unsatisfied with current policy and practice<br>5. To improve quality of life |

|                                                                                                          |                                                                                                                                                                                                                                                                                                        |
|----------------------------------------------------------------------------------------------------------|--------------------------------------------------------------------------------------------------------------------------------------------------------------------------------------------------------------------------------------------------------------------------------------------------------|
|                                                                                                          | 6. Lack of trust in knowledge and judgement of healthcare professionals<br>7. Healthcare professionals are over-reliant on tests and not symptoms or patient experience<br>8. No time to visit physician<br>9. Emergency use<br>10. Familiar with treatment<br>11. Financial reasons<br>4. Other _____ |
| 4. What are your sources of information for self-medication? (please select all that apply)              | 1. Previous experience<br>2. Family<br>3. Friends<br>4. Advertisements<br>5. Websites<br>6. Instagram<br>7. Twitter<br>8. Facebook (friends list)<br>9. Facebook (closed support group)<br>10. Other social media<br>11. Charities<br>12. Books<br>Other _____                                         |
| 5. To what extent to do agree self-medication is safe?                                                   | Five point Likert scale: Strongly disagree to strongly agree.                                                                                                                                                                                                                                          |
| 6. Do you have any concerns about safety and self-medication?                                            | 1. Free text                                                                                                                                                                                                                                                                                           |
| 7. Are any healthcare professionals aware that you self-medicate?                                        | 1. General practitioner<br>2. Nurse<br>3. Other (please state)<br>2. None                                                                                                                                                                                                                              |
| 8. Have you ever experienced side effects or complications after treating yourself?                      | 4. Yes (please state)<br>5. No                                                                                                                                                                                                                                                                         |
| 9. Do you chose to self-medicate to improve one particular symptom of your condition (more than others)? | 1. Fatigue<br>2. Mental Health (depression, anxiety etc.)<br>3. Concentration/brain fog<br>4. Pins and needles<br>5. Digestive issues<br>6. Leg cramps<br>7. Balance<br>8. Blurred vision<br>9. Hair loss<br>6. Other (please state)                                                                   |

**Table S2: Responses to Self-medication questionnaire**

| Item                                                             | Percentage | N (805, 62%) |
|------------------------------------------------------------------|------------|--------------|
| <b>Method of self-medication</b>                                 |            |              |
| Self-injection                                                   | 63%        | 510          |
| Solid oral medication usage                                      | 26%        | 210          |
| Liquid oral medication usage                                     | 14%        | 116          |
| Other (patches, sublingual's, sprays)                            | 18%        | 144          |
| <b>Reasons for self-medicating</b>                               |            |              |
| Unsatisfied with prescribed treatment                            | 42%        | 341          |
| Unsatisfied with prescribed treatment frequency                  | 68%        | 545          |
| Suboptimal relationship with healthcare professional             | 20%        | 164          |
| Unsatisfied with current policy and practice                     | 47%        | 379          |
| To improve quality of life                                       | 80%        | 644          |
| Lack of trust in knowledge and judgement of health professionals | 45%        | 366          |
| Healthcare professionals are over-reliant on tests               | 53%        | 429          |
| No time to visit physician                                       | 3%         | 23           |
| Emergency use                                                    | 4%         | 29           |
| Familiar with treatment                                          | 9%         | 69           |
| Financial reasons                                                | 1%         | 8            |
| <b>Sources of knowledge for self-medication</b>                  |            |              |
| Previous experience                                              | 27%        | 218          |
| Family                                                           | 11%        | 87           |
| Friends                                                          | 12%        | 94           |
| Advertisement                                                    | 1%         | 5            |
| Websites                                                         | 44%        | 355          |
| Instagram                                                        | 0%         | 1            |
| Twitter                                                          | 1%         | 5            |
| Facebook friends list                                            | 3%         | 21           |
| Facebook closed support group                                    | 72%        | 577          |
| Charities                                                        | 19%        | 154          |
| Books                                                            | 21%        | 169          |
| <b>Healthcare professional aware about self-medication</b>       |            |              |
| General Practitioner                                             | 30%        | 241          |
| Nurse                                                            | 19%        | 155          |
| None                                                             | 54%        | 437          |
| <b>Have you experienced any side effects of self-medicating?</b> |            |              |
| Yes                                                              | 0%         | 0            |
| No                                                               | 100%       | 805          |
| <b>Does self-medicating improve specific symptoms?</b>           |            |              |

|                         |     |     |
|-------------------------|-----|-----|
| Fatigue                 | 95% | 762 |
| Mental health           | 66% | 530 |
| Concentration/Brain fog | 87% | 697 |
| Pins and needles        | 78% | 629 |
| Digestive issues        | 54% | 433 |
| Leg cramps              | 50% | 405 |
| Balance                 | 58% | 470 |
| Blurred                 | 52% | 420 |
| Hair loss               | 32% | 261 |

To what extent do you agree self-medication (via injection) is safe?

|             |     |     |
|-------------|-----|-----|
| Agree       | 79% | 634 |
| Neutral     | 14% | 111 |
| Disagree    | 6%  | 47  |
| No response | 2%  | 13  |

**Table S3: Comparison of validation study mean scores on each domain with current study**

| PCPMOS Domain              | Greater Manchester Mean Domain Score from Validation Study (n=490) | Vitamin B12 Deficiency Mean Domain Score, Current Study (n=1297) |
|----------------------------|--------------------------------------------------------------------|------------------------------------------------------------------|
| Access                     | 3.49                                                               | 2.65                                                             |
| Communication              | 4.11                                                               | 2.82                                                             |
| External policy            | 3.57                                                               | 3.14                                                             |
| Information flow           | 3.81                                                               | 2.56                                                             |
| Organisation care planning | 3.91                                                               | 2.29                                                             |
| Patient-related factors    | 4.24                                                               | 2.73                                                             |
| Physical environment       | 4.15                                                               | 3.36                                                             |
| Referrals                  | 3.83                                                               | 2.82                                                             |
| Task performance           | 3.71                                                               | 2.56                                                             |
| Total PMOS score           | 3.87                                                               | 2.74                                                             |

**Table S4: Responses to individual PMOS items**

|                                                       | Agree (n) | Agree (%) | Neutral (n) | Neutral (%) | Disagree (n) | Disagree (%) | N/A (n) |
|-------------------------------------------------------|-----------|-----------|-------------|-------------|--------------|--------------|---------|
| I was always treated with dignity and respect.        | 649       | 50%       | 229         | 18%         | 409          | 32%          | 10      |
| The doctor always considered what I want for my care. | 387       | 30%       | 256         | 20%         | 640          | 49%          | 14      |

|                                                                                                                                        |      |     |     |     |     |     |     |
|----------------------------------------------------------------------------------------------------------------------------------------|------|-----|-----|-----|-----|-----|-----|
| The doctor did not have the skills, experience or knowledge to correctly manage my health condition.                                   | 282  | 22% | 201 | 15% | 762 | 59% | 52  |
| The doctor always seemed to have the right information after I received treatment elsewhere.                                           | 163  | 13% | 365 | 28% | 391 | 30% | 378 |
| The doctor was not interrupted during my consultation.                                                                                 | 811  | 63% | 110 | 8%  | 83  | 6%  | 293 |
| Other health professionals at this practice did not have the skills, experience or knowledge to correctly manage my health condition.  | 218  | 17% | 207 | 16% | 741 | 57% | 131 |
| I got answers to all the questions I had regarding my care.                                                                            | 231  | 18% | 178 | 14% | 864 | 67% | 24  |
| I was able to make an appointment with a health professional of my choice.                                                             | 478  | 37% | 157 | 12% | 614 | 47% | 48  |
| I understood what staff were explaining to me about my care                                                                            | 796  | 61% | 208 | 16% | 228 | 18% | 65  |
| Information about me that my health care team needed was always available e.g. discharge summary, referral letters, test results.      | 517  | 40% | 207 | 16% | 418 | 32% | 155 |
| Staff always knew everything they needed to know to care for me. e.g. allergies, other conditions, medical history, medications.       | 407  | 31% | 192 | 15% | 628 | 48% | 70  |
| The cost of medications did not prevent me from filling a script when I needed medication.                                             | 689  | 53% | 93  | 7%  | 101 | 8%  | 414 |
| I was able to access the after hours service when needed.                                                                              | 440  | 34% | 156 | 12% | 142 | 11% | 559 |
| I had enough time during the consultation with a health care professional.                                                             | 562  | 43% | 186 | 14% | 514 | 40% | 35  |
| I knew who to go to in the practice if I needed to ask a question.                                                                     | 535  | 41% | 185 | 14% | 513 | 40% | 64  |
| If I was referred important information about my care was passed on / made available.                                                  | 361  | 28% | 241 | 19% | 347 | 27% | 348 |
| Equipment needed for my care was always working properly.                                                                              | 638  | 49% | 139 | 11% | 93  | 7%  | 427 |
| I was involved in all the decisions about my care.                                                                                     | 423  | 33% | 226 | 17% | 573 | 44% | 75  |
| The practice was very clean.                                                                                                           | 1165 | 90% | 82  | 6%  | 28  | 2%  | 22  |
| The cost of seeing a doctor, nurse or other health professional at the practice did not prevent me from seeking care when I needed it. | 490  | 38% | 63  | 5%  | 25  | 2%  | 719 |
| I was able to make an appointment at a time that suited me.                                                                            | 583  | 45% | 181 | 14% | 512 | 39% | 21  |
| My test results were always available when required e.g. scans, blood tests, x-rays.                                                   | 634  | 49% | 175 | 13% | 392 | 30% | 96  |
| I always felt that staff listened to me about my concerns.                                                                             | 348  | 27% | 207 | 16% | 725 | 56% | 17  |

|                                                                                                               |      |     |     |     |     |     |     |
|---------------------------------------------------------------------------------------------------------------|------|-----|-----|-----|-----|-----|-----|
| Where necessary my doctor, nurse or other health professional regularly monitors/reviews my health condition. | 312  | 24% | 167 | 13% | 776 | 60% | 42  |
| Seeing the same doctor, nurse or other health professional is important to me.                                | 1061 | 82% | 139 | 11% | 78  | 6%  | 19  |
| Administration staff interacted with me in a manner I found acceptable.                                       | 744  | 57% | 220 | 17% | 316 | 24% | 17  |
| My referrals have always been appropriate.                                                                    | 612  | 47% | 232 | 18% | 239 | 18% | 214 |
| I was always given enough information that I could understand about my care and treatment.                    | 476  | 37% | 235 | 18% | 549 | 42% | 37  |

**Table S5: Logistic regression analysis to assess association of key variables with self-medication via injection**

| <b>Variable</b>                      | <b>OR</b> | <b>SE</b> | <b>95% CI</b> | <b>P-value</b>    |
|--------------------------------------|-----------|-----------|---------------|-------------------|
| <i>Self-medicated:</i>               |           |           |               |                   |
| - No                                 | 1         | NA        | NA            | NA                |
| - Yes                                | 5.413     | 2.047     | 1.516, 8.712  | 0.967             |
| PMOs total                           | 0.977     | 1.003     | 0.971, 0.984  | <b>&lt;0.0001</b> |
| DOM1: Patient related factors        | 0.753     | 1.028     | 0.712, 0.794  | <b>&lt;0.0001</b> |
| DOM2: Task performance               | 0.857     | 1.020     | 0.824, 0.890  | <b>&lt;0.0001</b> |
| DOM3: Quality of communication       | 0.912     | 1.012     | 0.890, 0.933  | <b>&lt;0.0001</b> |
| DOM4: Access                         | 0.942     | 1.016     | 0.913, 0.972  | <b>0.0002</b>     |
| DOM5: Information Flow               | 0.960     | 1.016     | 0.931, 0.989  | <b>0.0079</b>     |
| DOM6: external policy context        | 1.044     | 1.017     | 1.011, 1.078  | <b>0.0085</b>     |
| DOM7: Organisation and care planning | 0.935     | 1.018     | 0.902, 0.968  | <b>0.0002</b>     |
| DOM8: referrals                      | 0.939     | 1.021     | 0.901, 0.979  | <b>0.0032</b>     |
| DOM9: Physical environment           | 0.903     | 1.026     | 0.858, 0.950  | <b>&lt;0.0001</b> |
| <i>Diagnosis:</i>                    |           |           |               |                   |
| - B12                                | 1         | NA        | NA            | NA                |
| - B12 & PA                           | 0.759     | 1.121     | 0.606, 0.949  | <b>0.016</b>      |
| <i>Health status:</i>                |           |           |               |                   |
| - Good/Excellent                     | 1         | NA        | NA            | NA                |
| - Fair/Poor                          | 1.459     | 1.136     | 1.139, 1.876  | <b>0.003</b>      |
| <i>Health literacy:</i>              |           |           |               |                   |
| - Always/Often                       | 1         | NA        | NA            | NA                |
| - Sometimes                          | 1.475     | 1.437     | 0.733, 3.063  | 0.284             |
| - Rarely                             | 1.226     | 1.439     | 0.607, 2.550  | 0.576             |
| - Never                              | 1.230     | 1.384     | 0.661, 2.383  | 0.524             |
| <i>Education level:</i>              |           |           |               |                   |
| - College or university              | 1         | NA        | NA            | NA                |
| - Higher or secondary                | 0.879     | 1.167     | 0.648, 1.189  | 0.405             |



|                             |       |       |              |              |
|-----------------------------|-------|-------|--------------|--------------|
| - Post-graduate             | 1.170 | 1.170 | 0.858, 1.592 | 0.319        |
| - Prefer not to say         | 0.777 | 1.390 | 0.398, 1.460 | 0.444        |
| - Primary/ Secondary school | 0.824 | 1.190 | 0.584, 1.154 | 0.264        |
| <i>Age:</i>                 |       |       |              |              |
| - 18 to 34 yrs.             | 1     | NA    | NA           | NA           |
| - 35 to 44 yrs.             | 1.330 | 1.203 | 0.928, 1.916 | 0.123        |
| - 45 to 54 yrs.             | 1.660 | 1.193 | 1.179, 2.354 | <b>0.004</b> |
| - 55 to 64 yrs.             | 1.799 | 1.220 | 1.221, 2.664 | <b>0.003</b> |
| - 65 yrs. And older         | 2.112 | 1.295 | 1.272, 3.514 | <b>0.004</b> |
| <i>Gender:</i>              |       |       |              |              |
| - Female                    | 1     | NA    | NA           | NA           |
| - Male                      | 0.933 | 1.311 | 0.542, 1.573 | 0.797        |
| - NR                        | 0.308 | 2.995 | 0.016, 1.919 | 0.283        |
| <i>Country:</i>             |       |       |              |              |
| Other                       | 1     | NA    | NA           | NA           |
| England/Wales               | 1.203 | 1.154 | 0.911, 1.596 | 0.196        |

**Table S6: Multivariable logistic regression model for factors associated with patients who self-inject**

| Variable                                    | OR    | 2.50% | 97.50% | P-value       | VIF*  |
|---------------------------------------------|-------|-------|--------|---------------|-------|
| (Intercept)                                 | 2.329 | 1.158 | 4.709  | <b>0.0180</b> | -     |
| Total PMOS score                            | 0.957 | 0.888 | 1.030  | 0.2409        | 4.165 |
| DOM1: Patient related factors               | 0.821 | 0.734 | 0.918  | <b>0.0006</b> | 2.005 |
| DOM2: Task performance                      | 0.947 | 0.869 | 1.032  | 0.2141        | 2.093 |
| DOM3: Quality of communication              | 1.025 | 0.933 | 1.126  | 0.6105        | 3.835 |
| DOM4: Access                                | 1.078 | 0.991 | 1.174  | 0.0817        | 2.499 |
| DOM5: Information Flow                      | 1.108 | 1.016 | 1.210  | <b>0.0216</b> | 2.656 |
| DOM6: external policy context               | 1.100 | 1.016 | 1.192  | <b>0.0194</b> | 2.314 |
| DOM7: Organisation and care planning        | 0.985 | 0.931 | 1.043  | 0.6045        | 1.490 |
| DOM8: referrals                             | 1.061 | 0.964 | 1.168  | 0.2264        | 2.119 |
| DOM9: Physical environment                  | 1.030 | 0.930 | 1.140  | 0.5696        | 1.859 |
| PA vs. B12 diagnosis                        | 0.802 | 0.629 | 1.021  | 0.0738        | 1.010 |
| Fair/Poor vs. Good/Excellent Health Overall | 1.154 | 0.877 | 1.522  | 0.3085        | 1.035 |
| Age [35–44 years old. vs. < 34]             | 1.490 | 1.012 | 2.203  | <b>0.0444</b> | 1.019 |
| Age [45–54 years old. vs. < 34]             | 2.064 | 1.423 | 3.017  | <b>0.0002</b> | -     |
| Age [55–64 years old. vs. < 34]             | 2.310 | 1.511 | 3.552  | <b>0.0001</b> | -     |

|                                   |                                                                |       |       |               |   |
|-----------------------------------|----------------------------------------------------------------|-------|-------|---------------|---|
| Age [75 years and older vs. < 34] | 2.803                                                          | 1.607 | 4.909 | <b>0.0003</b> | - |
| Final model fit statistics:       | AIC=1589.8; R <sup>2</sup> =13%; $\chi^2$ (8) = 4.666, P=0.793 |       |       |               |   |

\*VIF: variance inflation factor estimated using 'regclass' package in R and is interpreted as:

- 1= not correlated
- Between 1 and 5 = moderately correlated
- Greater than 5 = highly correlated.

**Table S7: Summary of Thematic Synthesis**

| Concerns about self-medication (responses from n=638/805) | Summary                                                                                            | Key themes within the responses and example quotes                                                                                                                                                                                                                                                                                                                                                                                                                                                                                                                                                                                                                                                                                                                                                                                                                                                                                                                                                                                                                                                                                                                                                                                                                                                                                                                                                                                                                                                                                                                                                                                                                                                                                                                                                                              |
|-----------------------------------------------------------|----------------------------------------------------------------------------------------------------|---------------------------------------------------------------------------------------------------------------------------------------------------------------------------------------------------------------------------------------------------------------------------------------------------------------------------------------------------------------------------------------------------------------------------------------------------------------------------------------------------------------------------------------------------------------------------------------------------------------------------------------------------------------------------------------------------------------------------------------------------------------------------------------------------------------------------------------------------------------------------------------------------------------------------------------------------------------------------------------------------------------------------------------------------------------------------------------------------------------------------------------------------------------------------------------------------------------------------------------------------------------------------------------------------------------------------------------------------------------------------------------------------------------------------------------------------------------------------------------------------------------------------------------------------------------------------------------------------------------------------------------------------------------------------------------------------------------------------------------------------------------------------------------------------------------------------------|
| Not Concerned (n=386)                                     | Over 50% of the participants stated that they were not concerned about safety and self-medication. | <ol style="list-style-type: none"> <li>1) <b>Experience:</b> Patients reported having experience with needles and self-medicating. For example, many patients who were diabetic, qualified healthcare professionals or taught by a qualified healthcare professional (which makes the transition to self-medication easier). Also many patients reported that they were confident about self-medicating because they have done sufficient research. <b><i>'No I'm a registered nurse'</i></b></li> <li>2) <b>Lack of trust in GPs:</b> Lack of trust led to many patients conducting research into B12 deficiency independently and they feel as they know more than GPs when it comes to managing B12 deficiency. Many patients reported the lack of trust due to misdiagnosis, lack of curiosity from the GPs or financial issues related to visiting the GP regularly. <b><i>'I would prefer medical supervision, but feel doctors don't have enough knowledge to treat me properly.'</i></b></li> <li>3) <b>Improved Quality of Life:</b> Many patients reported that they have found a much better quality of life once they started self-medicating and this forms part of the reason why they are confident as they have seen results. <b><i>'No as my life it's gone back to almost normal. I was super ill before I started to self-inject.'</i></b></li> <li>4) <b>Adherence to guidelines:</b> Some patients were not worried about over-medicating because they mentioned that they follow BSH or NICE guidelines on the maximum doses. Other patients were under the conception over medication has no side effects. <b><i>'No because you cannot over dose on B12'</i></b></li> <li>5) <b>Credibility of sources:</b> Some patients mentioned that they were not worried because they purchase the B12</li> </ol> |

|                           |                                                                                                                                                                             |                                                                                                                                                                                                                                                                                                                                                                                                                                                                                                                                                                                                                                                                                                                                                                                                                                                                                                                                                                                                                                                                                                                                                                                                                                                                    |
|---------------------------|-----------------------------------------------------------------------------------------------------------------------------------------------------------------------------|--------------------------------------------------------------------------------------------------------------------------------------------------------------------------------------------------------------------------------------------------------------------------------------------------------------------------------------------------------------------------------------------------------------------------------------------------------------------------------------------------------------------------------------------------------------------------------------------------------------------------------------------------------------------------------------------------------------------------------------------------------------------------------------------------------------------------------------------------------------------------------------------------------------------------------------------------------------------------------------------------------------------------------------------------------------------------------------------------------------------------------------------------------------------------------------------------------------------------------------------------------------------|
|                           |                                                                                                                                                                             | from credible sources or go privately for B12. <b><i>'No if sourced from a well-known pharmacy supplier'</i></b>                                                                                                                                                                                                                                                                                                                                                                                                                                                                                                                                                                                                                                                                                                                                                                                                                                                                                                                                                                                                                                                                                                                                                   |
| Mixed/Indifferent (n=60)* | This group was largely categorised by patients who were initially concerned but were no longer concerned                                                                    | <p><b>1) Overcame initial concerns:</b> Patients reported initial worries with regards to self-medicating, however once the benefits from self-medicating were experienced their concerns alleviated or disappeared. <b><i>'I did at first but not now'</i></b></p> <p><b>2) Social Support:</b> Others mentioned they would be worried however, they have a good support circle around them which includes online forum groups. <b><i>'If I didn't have the online support group I had with the plethora of knowledge they share I definitely wouldn't have been able to self-inject safely.'</i></b></p> <p><b>3) Type of Injection:</b> Patients have mixed feelings to self-medicating used subcutaneous injections and intramuscular <b><i>'I used to do subcutaneous injections into my belly and have always feared that somehow I would hit something I am not supposed to hit, e.g. an organ, or that I wasn 't injecting it at the right angle or depth and the B12 would just sit under my skin without ever dissolving and eventually make me sick. I have since switched to my thigh and am no longer worried.'</i></b></p>                                                                                                                           |
| Concerned (n=192)         | Most patients who were concerned, would have preferred treatment administered via medical professionals but felt they had no other choice to improve their quality of life. | <p><b>1) Preference of health professional administration:</b> they would much rather prefer a healthcare professional to administer the B12 injections, rather than self-inject <b><i>'Yes. I would prefer a health care professional to administer.'</i></b></p> <p><b>2) No other choice:</b> Patients reported worries about self-medicating but they continue because they 'have no choice'. <b><i>'I don't feel safe self-injecting, but I don't have any other choice'</i></b></p> <p><b>3) Complications:</b> Patients are worried about hitting a vessel or nerve, because it is an intramuscular injection, or they previously experienced such complications <b><i>'Worry about hitting a nerve!'</i></b></p> <p><b>4) Storage and Disposal:</b> Patient reported concerns over storage and disposal of the B12 and needles <b><i>'I have no way to dispose of needles unless I register as a drug addict.'</i></b></p> <p><b>5) Financial and Credibility Concerns:</b> Some patients reports financial concerns over self-medicating, many patients purchasing the medication abroad and they are worried about the reliability of the medication. <b><i>'I'm a little dubious about what I could be buying online to inject into myself'</i></b></p> |

\*The patients categorised as mixed/indifferent were hard to categorise objectively, 167 participants did not respond to this question

| Effect of Covid-19 on treatment |                                                                                |                                                                                                                                                                                                                                                                                                                                                                                                                                                                                                                                                                                                                                                                                                                                                                                                                                                                                                                                                                                                                                                                                                                                                                 |
|---------------------------------|--------------------------------------------------------------------------------|-----------------------------------------------------------------------------------------------------------------------------------------------------------------------------------------------------------------------------------------------------------------------------------------------------------------------------------------------------------------------------------------------------------------------------------------------------------------------------------------------------------------------------------------------------------------------------------------------------------------------------------------------------------------------------------------------------------------------------------------------------------------------------------------------------------------------------------------------------------------------------------------------------------------------------------------------------------------------------------------------------------------------------------------------------------------------------------------------------------------------------------------------------------------|
| Not Affected (n=495)            | Many reported not being affected and this was because they self-medicate       | <ol style="list-style-type: none"> <li>1. <b>Self-Medication:</b> Many self-medicate therefore felt this question was not applicable to them.</li> <li>2. <b>Proactive GP:</b> GP has been proactive and been consistent with following up with them,</li> <li>3. <b>Proactive Patient:</b> Patients feel they have to pester the GP to obtain their injection,</li> <li>4. <b>Receiving Treatment in Car:</b> Some reported that they couldn't go into the GP but they would receive the injections in the car during the pandemic,</li> <li>5. <b>Alternative treatment sufficient:</b> Some patients were offered alternatives such as oral tablets of B12 and some patients felt they were more sustainable than injections and worked for them</li> <li>6. <b>Direct contact with nurse practitioner:</b> Those who directly liaised with nurse practitioners to get the B12 appointments did not seem to miss any injections</li> <li>7. <b>Location:</b> There was a tendency in the data for those in England, Wales and Scotland to report more effects than other countries, as those from other countries did not report any disturbance.</li> </ol> |
| Affected (n=749)                | The main reported problem in this group was termination of regular injections. | <ol style="list-style-type: none"> <li>1. <b>Appointment difficulties:</b> COVID-19 made it much harder for patients to get an appointment with the doctor</li> <li>2. <b>Treatment stopped or cancelled:</b> Many patients reported poor experiences with the GP during COVID and got their appointments/treatments cancelled or refused. They were told that they were 'not priority' and one patient reported that their appointment was cancelled without their acknowledgement.</li> <li>3. <b>Monitoring and diagnosis stopped:</b> Many patients could not get an appointment to monitor their B12 deficiency or pernicious anaemia as they were refused blood tests.</li> <li>4. <b>Alternative treatments not effective:</b> Patients with pernicious anaemia were more effected by COVID-19 as oral tablets are not effective on them so they became more difficult to manage remotely. Many patients reported that they were given</li> </ol>                                                                                                                                                                                                        |

|  |  |                                                                                                                                                                                                                                                                                                                                                                                                                                                           |
|--|--|-----------------------------------------------------------------------------------------------------------------------------------------------------------------------------------------------------------------------------------------------------------------------------------------------------------------------------------------------------------------------------------------------------------------------------------------------------------|
|  |  | <p>alternatives to help ease the transition to remote care during the pandemic.</p> <p>5. <b>Delayed/Reduced Frequency of Injections:</b> Some patients still gotten their injections, however, they were delayed or given at a slower rate.</p> <p>6. <b>Effect on Daily Activities:</b> Patients that were effected heavily reported severe symptoms of fatigue and pain; this resulted in them not being able to carry out their daily activities.</p> |
|--|--|-----------------------------------------------------------------------------------------------------------------------------------------------------------------------------------------------------------------------------------------------------------------------------------------------------------------------------------------------------------------------------------------------------------------------------------------------------------|

\*51 patients gave a not applicable answer, primarily because they no longer sought primary care provision due to dissatisfaction
